# Supplementary material for: A Highly Sensitive Humidity Sensor Based on Ultrahigh-Frequency Microelectromechanical Resonator Coated with Nano-Assembled Polyelectrolyte Thin Films
Source: MDPI journal article supplement (doi:10.3390/mi8040116), 2017-04-05
Supplement: s1 [file s1]

# Supplementary Materials: A Highly Sensitive Humidity Sensor Based on Ultrahigh-Frequency Microelectromechanical Resonator Coated with Nano-Assembled Polyelectrolyte Thin Films

Wenpeng Liu, Hemi Qu, Jizhou Hu, Wei Pang, Hao Zhang, and Xuexin Duan

## 1. Calculation of Specific Surface Area ( $S_{\text{BET}}$ )

The specific surface area ( $S_{\text{BET}}$ ) is calculated with the following equations:

$$\frac{1}{v \left( \frac{p_0}{p} - 1 \right)} = \frac{c-1}{v_m c} \times \frac{p}{p_0} + \frac{1}{v_m c} \quad (\text{S1})$$

$$S_{\text{BET}} = \frac{v_m N s}{V a} \quad (\text{S2})$$

where  $p$  represents the partial vapor pressure and  $p_0$  represents the saturated vapor pressure,  $v$  is the absorbed mass of vapor,  $v_m$  is the monolayer absorbed mass of vapor,  $c$  is the BET constant,  $N$  is Avogadro's number ( $6.02 \times 10^{23} \text{ mol}^{-1}$ ),  $s$  is the adsorption cross section of the water molecule ( $\pi \times 1.2^2 \times 10^{-20} \text{ m}^2$ ),  $V$  is the molar volume of the vapor (22.4 L/mol), and  $a$  is the mass of the sensitive layer ( $2.6 \times 10^{-10} \text{ g}$ ). To simplify the fitting process, Equation (S1) takes the form:

$$\frac{1}{v} = A \left( 1 - \frac{p}{p_0} \right) + B \left( \frac{p_0}{p} - 1 \right) \quad (\text{S3})$$

where

$$A = \frac{c-1}{v_m c} \quad (\text{S4})$$

$$B = \frac{1}{v_m c} \quad (\text{S5})$$

$v$  is calculated by the frequency shift according to Sauerbrey's equation:

$$\frac{\Delta f}{f_s} \approx - \frac{\rho_m d_m}{\rho_0 d_0} \quad (\text{S6})$$

where  $\Delta f$  is the frequency shift,  $\rho_m$  and  $\rho_0$  are the density of the mass loading layer and the resonator layer,  $d_m$  and  $d_0$  are the thickness of the mass loading layer and the resonator respectively.

Figure S1 and Table S1 show the fitting results whereby the specific surface area is obtained.

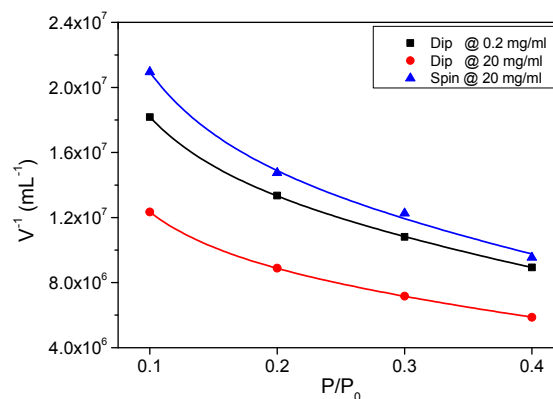

**Figure S1.** Fitting results of specific surface area using the Brunauer-Emmett-Teller (BET) equation.

**Table S1.** Extracted value of  $A$ ,  $B$ ,  $v_m$  and  $S_{BET}$  using the Brunauer–Emmett–Teller (BET) equation.

| Sample          | $A$                | $B$                | $v_m$                    | $S_{BET}$          |
|-----------------|--------------------|--------------------|--------------------------|--------------------|
| Dip @ 0.2 mg/mL | $1.31 \times 10^7$ | $7.10 \times 10^5$ | $7.24 \times 10^{-8}$    | $3.38 \times 10^2$ |
| Dip @ 20 mg/mL  | $8.49 \times 10^6$ | $5.22 \times 10^5$ | $1.10946 \times 10^{-7}$ | $5.19 \times 10^2$ |
| Spin @ 20 mg/mL | $1.39 \times 10^7$ | $9.33 \times 10^5$ | $6.72347 \times 10^{-8}$ | $3.14 \times 10^2$ |

## 2. Responses to Carbon Dioxide (CO<sub>2</sub>)

As a dominating gas in the environment, CO<sub>2</sub> causes cross-sensitivity which is a crucial issue for the sensor in real application. In order to determine the cross-sensitivity to CO<sub>2</sub> of polyelectrolyte (PET)-coated film bulk acoustic resonator (FBAR), we recorded responses to CO<sub>2</sub> via FBAR coated with 30 poly(sodium 4-styrenesulfonate)/poly(diallyldimethylammonium choride) (PSS/PDDA) bilayers. Compared with water vapor, PET-coated FBAR shows negligible responses to CO<sub>2</sub>, as shown in Figure S2. This is attributed to the fact that polar PSS/PDDA films absorb negligible amount of non-polar CO<sub>2</sub>.

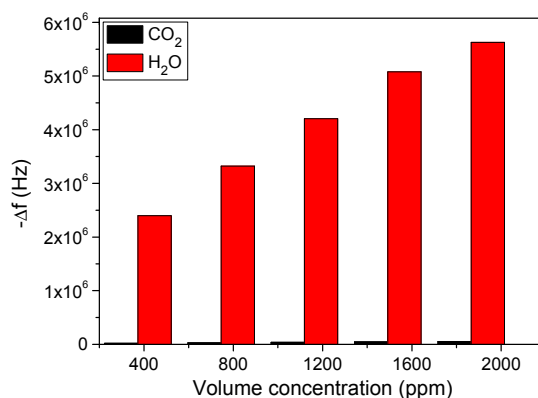**Figure S2.** Comparison of frequency shift between CO<sub>2</sub> and water vapor with respect to the various volume concentration.
